# Supplementary material for: Non-Helicobacter pylori Helicobacter Species as a Cause of Refractory Chronic Cellulitis in X-Linked Agammaglobulinemia
Source: Springer Nature journal article supplement (doi:10.1007/s10875-024-01668-y), 2024-02-16
Supplement: MOESM2 [file 26741492]

TABLE 1 Summary of case reports of NHPH infections in XLA (Total 27cases) .

|                                     |                 | Cases                                 | (%)                              |                 | Sample           | Cases                | (%)       |             |                       |      |   |       |
|-------------------------------------|-----------------|---------------------------------------|----------------------------------|-----------------|------------------|----------------------|-----------|-------------|-----------------------|------|---|-------|
| Species                             | single pathogen | H. Cinaedi                            | 11                               | 40.74           | Diagnosis method | 16S sequencing       | Blood     | 2           | 7.41                  |      |   |       |
|                                     |                 | H. bilis                              | 7                                | 25.92           |                  | (14cases, 51.85%)    | Biopsy    | 6           | 22.22                 |      |   |       |
|                                     |                 | H.canis                               | 1                                | 3.70            |                  | Pus                  | 1         | 3.70        |                       |      |   |       |
|                                     |                 | H. fennelliae                         | 1                                | 3.70            |                  | Blood                | 5         | 18.52       |                       |      |   |       |
|                                     |                 | Helicobacter sp                       | 1                                | 3.70            |                  | PCR                  | -         | 3           | 11.11                 |      |   |       |
|                                     |                 | Helicobacter/Flexispira-like organism | 1                                | 3.70            |                  | mNGS (*)             | Blood (*) | 2           | 7.41                  |      |   |       |
|                                     |                 | H. Equorum -like                      | 1                                | 3.70            |                  |                      | Pus (*)   | 2           | 7.41                  |      |   |       |
|                                     |                 | Canadensis-like                       | 1                                | 3.70            |                  | Cultures             | Blood     | 4           | 14.81                 |      |   |       |
|                                     |                 | Helicobacter trogontum                | 1                                | 3.70            |                  |                      | Pus       | 0           | 0.00                  |      |   |       |
|                                     |                 | H. Canis and H. Bilis (F. rappini)    | 1                                | 3.70            |                  | 23S sequencing       | -         | 1           | 3.70                  |      |   |       |
|                                     |                 | H.equorum and H.canadensis (*)        | 1                                | 3.70            |                  | Mass spectrometry    | -         | 5           | 18.52                 |      |   |       |
|                                     |                 | Type of infection                     | cellulitis (*) (17cases, 62.96%) | Lower limbs (*) |                  | 15                   | 55.55     | Antibiotics | Imipenem/cilastin (*) | -    | 8 | 29.63 |
|                                     |                 |                                       |                                  | upper limb      |                  | 4                    | 14.81     |             | Meropenem             | -    | 5 | 18.52 |
| unknown                             | 2               |                                       |                                  | 7.41            | Ertapenem        | -                    | 3         |             | 11.11                 |      |   |       |
| P-G-like ulcer (*) (7cases, 25.92%) | lower limbs (*) |                                       |                                  | 6               | 22.22            | Panipenem/betamipron | -         |             | 1                     | 3.70 |   |       |
| upper limbs                         | 1               |                                       |                                  | 3.70            | Ceftazidime      | -                    | 1         |             | 3.70                  |      |   |       |

TABLE 1 continue

|                   |                                                    |           |    |                |             |                                                  |      |   |       |
|-------------------|----------------------------------------------------|-----------|----|----------------|-------------|--------------------------------------------------|------|---|-------|
| Type of infection | Hyperpigmented plaques<br>and subcutaneous nodules | both legs | 1  | 3.70           | Antibiotics | Doxycycline (*)                                  | -    | 7 | 25.93 |
|                   | Erythematous plaques                               | ankle     | 1  | 3.70           |             | Minocycline                                      | -    | 6 | 22.22 |
|                   | * skin infection<br>(all the above)                | -         | 19 | 70.37          |             | Amoxicillin/amoxicillinclavula<br>nate potassium | -    | 4 | 14.81 |
|                   | Sepsis (*)                                         | -         | 12 | 44.44          |             | Netronidazole                                    | -    | 4 | 14.81 |
|                   | Osteomyelitis                                      | -         | 2  | 7.41           |             | Ciprofloxacin                                    | -    | 1 | 3.70  |
|                   | Suppurative cholangitis                            | -         | 3  | 11.11          |             | Tobramycin                                       | -    | 1 | 3.70  |
|                   | Abdominal abscess                                  | -         | 1  | 3.70           |             | Rifampicin (*)                                   | -    | 3 | 11.11 |
|                   | Refractory chronic pleurisy                        | -         | 1  | 3.70           |             | Clarithromycin                                   | -    | 3 | 11.11 |
|                   | synovitis                                          | -         | 1  | 3.70           |             | Levofloxacin                                     | -    | 1 | 3.70  |
|                   |                                                    |           |    |                |             | Amikacin                                         | -    | 1 | 3.70  |
|                   |                                                    |           |    |                |             | Moxifloxacin                                     | -    | 2 | 7.41  |
|                   |                                                    |           |    |                |             | Gentamicin                                       | -    | 5 | 18.52 |
|                   |                                                    |           |    |                |             | Ceftriaxone                                      | -    | 3 | 11.11 |
|                   |                                                    |           |    |                |             | Cefepime                                         | -    | 1 | 3.70  |
|                   |                                                    |           |    |                |             | TrimethoprimSulfamethoxazole                     | -    | 2 | 7.41  |
|                   |                                                    |           |    | Vancomycin     | -           | 1                                                | 3.70 |   |       |
|                   |                                                    |           |    | Linezolid      | -           | 1                                                | 3.70 |   |       |
|                   |                                                    |           |    | Kanamycin      | -           | 1                                                | 3.70 |   |       |
|                   |                                                    |           |    | Fosfomycin (*) | -           | 2                                                | 7.41 |   |       |
|                   |                                                    |           |    | Azithromycin   | -           | 2                                                | 7.41 |   |       |

(\*) : our patient \* There are 4 patients have both cellulitis and PG-like ulcers, and 4patients have both upper and lower extremity cellulitis.

## References

- [1] Weir S, Cuccherini B, Whitney AM, et al. Recurrent Bacteremia Caused by a “Flexispira”-Like Organism in a Patient With X-Linked (Bruton’s) Agammaglobulinemia. *J. Clin. Microbiol.* 1999;37, 2439 – 2445.
- [2] Cuccherini B, Chua K, Gill V, et al. Bacteremia and Skin/Bone Infections in Two Patients With X-Linked Agammaglobulinemia Caused by an Unusual Organism Related to Flexispira/Helicobacter Species. *Clin. Immunol.* 2000;97, 121-129.
- [3] Han S, Schindel C., Genitsariotis R, et al. Identification of a Unique Helicobacter Species by 16S rRNA Gene Analysis in an Abdominal Abscess From a Patient With X-Linked Hypogammaglobulinemia. *J. Clin. Microbiol.* 2000;38, 2740 – 2742.
- [4] Gerrard J, Alfredson D, and Smith I. Recurrent Bacteremia and Multifocal Lower Limb Cellulitis Due to Helicobacter-Like Organisms in a Patient With X-Linked Hypogammaglobulinemia. *Clin. Infect. Dis.* 2001;33, E116 – E118.
- [5] Simons E, Spacek L A, Lederman HM, and Winkelstein J A. Helicobacter Cinaedi Bacteremia Presenting as Macules in an Afebrile Patient With X-Linked Agammaglobulinemia. *Infection*;2004,32, 367 – 368.
- [6] Leemann C, Gambillara E, Prod’homme G, et al. First case of bacteremia and multifocal cellulitis due to Helicobacter canis in an immunocompetent patient. *J Clin Microbiol.* 2006 ;44(12):4598-600.
- [7] Schwarze-Zander C, Becker S, Wenzel J, et al. Bacteremia Caused by a Novel Helicobacter Species in a 28-Year-Old Man With X-Linked Agammaglobulinemia. *J. Clin. Microbiol.* 2010;48,4672 – 4676.
- [8] Murray P R, A Uzel, G Ranken, et al. Pyoderma Gangrenosum-Like Ulcer in a Patient With X-Linked Agammaglobulinemia: Identification of Helicobacter Bilis by Mass Spectrometry Analysis. *Arch.* 2010;146, 523–526. doi: 10.1001/archdermatol.2010.86
- [9] Funato M, Kaneko H, Ohkusu K, et al.. Refractory Chronic Pleurisy Caused by Helicobacter Equorum-Like Bacterium in a Patient With X-Linked Agammaglobulinemia. *J. Clin. Microbiol.* 2011;49, 3432 – 3435.
- [10] Sharp S E. Chronic Skin Lesions From a Patient With Bruton’s X-Linked Agammaglobulinemia. *J. Clin. Microbiol.* 2011;49, 483 – 48+.
- [11] Dua J, Elliot E, Bright P, et al. Pyoderma Gangrenosum-Like Ulcer Caused by Helicobacter Cinaedi in a Patient With X-Linked Agammaglobulinaemia. *Clin. Exp. Dermatol.* 2012;37, 642 – 645
- [12] Turvey SE, Leo SH, Boos A, et al. Successful Approach to Treatment of Helicobacter Bilis Infection in X Linked Agammaglobulinemia. *J. Clin. Immunol.* 2012;32, 1404 – 1408.

- [13] Toyofuku M, Tomida J., Kawamura Y, et al. Helicobacter Cinaedi Bacteremia Resulting From Antimicrobial Resistance Acquired During Treatment for X-Linked Agammaglobulinemia. *Infect. Chemother.* 2016;22, 704 – 706.
- [14] Degand N, Dautremer J, Pilmis B, et al. Helicobacter Bilis-Associated Suppurative Cholangitis in a Patient With X-Linked Agammaglobulinemia. *J. Clin. Immunol.* 2017;37, 727 – 731.
- [15] Hill A, Byrne A, Bouffard D, et al. Helicobacter Cinaedi Bacteremia Mimicking Eosinophilic Fasciitis in a Patient With X-Linked Agammaglobulinemia. *JAAD Case Rep.* 2018;4, 327 – 329.
- [16] Matsumoto A, Yeh I, Schwartz B, et al. Chronic Helicobacter Cinaedi Cellulitis Diagnosed by Microbial Polymerase Chain Reaction, 2017; *JAAD Case Rep.* 3, 398 – 400.
- [17] Sugimoto M, Takeichi T, Muramatsu H, et al. Recurrent Cellulitis Caused by Helicobacter Cinaedi in a Patient With X-Linked Agammaglobulinaemia. *Acta Derm. Venereol.* 2017;97, 277 – 278.
- [18] Inoue K, Sasaki S, Yasumi T, et al. Helicobacter Cinaedi-Associated Refractory Cellulitis in Patients With X-Linked Agammaglobulinemia. *J Clin Immunol* 2020;40, 1132 – 1137.
- [19] Fettingner NB, Bradley, JS, Ramchandar N. An 11-Year-old Male With X-linked Agammaglobulinemia and Persistent Abdominal Pain. *Pediatr Infect Dis J.* 2021;1;40(4):356 -358
- [20] Romo-Gonzalez C, Bustamante-Ogando JC, Yamazaki-Nakashimada MA, et al. Infections With Enterohepatic Non- H. pylori Helicobacter Species in X-Linked Agammaglobulinemia: Clinical Cases and Review of the Literature. *Front Cell Infect Microbiol.* 2022;4:11:807136.
- [21] Lenskaya V, O'Connor M, de Moll EH, et al. Relapsing Helicobacter cinaedi Cellulitis without Bacteremia in a Patient with X-linked Agammaglobulinemia after 1 Year of Antibiotic Prophylaxis. *Skinme.* 2022 ;20;20(6):457-459.
- [22] Fjordside L, Herløv C, Drabe CH, et al. Helicobacter trogontum Bacteremia and Lower Limb Skin Lesion in a Patient with X-Linked Agammaglobulinemia-A Case Report and Review of the Literature. *Pathogens.* 2022 ;27;11(11):1247.
- [23] Zhang L, Zhou ML, Lv W, et al. Metagenomics assists in the diagnosis of a refractory, culture-negative pyoderma gangrenosum-like ulcer caused by Helicobacter cinaedi in a patient with primary agammaglobulinemia. *J Microbiol Immunol Infect.* 2023;56(6):1284-1287.
