# Supplementary material for: Non-Helicobacter pylori Helicobacter Species as a Cause of Refractory Chronic Cellulitis in X-Linked Agammaglobulinemia
Source: Springer Nature journal article supplement (doi:10.1007/s10875-024-01668-y), 2024-02-16
Supplement: MOESM3 [file 26741492]

This document certifies that the manuscript

Non-Helicobacter pylori Helicobacter species as a cause of refractory chronic  
Cellulitis in X-Linked Agammaglobulinemia

prepared by the authors

Qianqian Zhao, Jijun Ma, Jiawen Wu, Abdurahman•Matruzi, Chongwei Li

was edited for proper English language, grammar, punctuation, spelling, and overall style  
by one or more of the highly qualified native English speaking editors at SNAS.

This certificate was issued on **January 30, 2024** and may be verified  
on the [SNAS website](#) using the verification code **EBC9-6CA5-C56B-7248-B6AP**.

Neither the research content nor the authors' intentions were altered in any way during the editing process. Documents receiving this certification should be English-ready for publication; however, the author has the ability to accept or reject our suggestions and changes. To verify the final SNAS edited version, please visit our verification page at [secure.authorservices.springernature.com/certificate/verify](https://secure.authorservices.springernature.com/certificate/verify).

If you have any questions or concerns about this edited document, please contact SNAS at [support@as.springernature.com](mailto:support@as.springernature.com).
