# Supplementary material for: Non-Helicobacter pylori Helicobacter Species as a Cause of Refractory Chronic Cellulitis in X-Linked Agammaglobulinemia
Source: Springer Nature journal article supplement (doi:10.1007/s10875-024-01668-y), 2024-02-16
Supplement: MOESM4 [file 26741492]

Journal Name: Journal of Clinical Immunology

Title: Non-Helicobacter pylori Helicobacter species as a cause of refractory chronic Cellulitis in X-linked agammaglobulinemia

Qianqian Zhao<sup>1</sup>, Jijun Ma<sup>1</sup>, Jiawen Wu<sup>1</sup>, Abdurahman•Matruzi<sup>2</sup>, Chongwei Li<sup>1\*</sup>

<sup>1</sup> Department of Rheumatology & Clinical Immunology, Tianjin Children's Hospital (Tianjin University Children's Hospital), Tianjin, China; Tianjin Key Laboratory of Birth Defects for Prevention and Treatment, Tianjin, China

<sup>2</sup> Department of Internal Medicine, Tianjin Children's Hospital (Tianjin University Children's Hospital), Tianjin, China

\* Correspondence: leechongwei@126.com

TABLE2 Antibiotics regimens used

| Time           | Regimen                                        | Duration | Effect              |
|----------------|------------------------------------------------|----------|---------------------|
| 2019.1~2020.10 | ceftriaxone                                    | 1 week   | transient           |
|                | latamoxef                                      | 1 week   | transient           |
|                | mezlocillin/sulbactam+linezolid(P.O)           | 1 week   | transient           |
|                | levofloxacin                                   | 1 week   | failed              |
|                | moxifloxacin                                   | 1 week   | failed              |
|                | cefdinir                                       | 1 week   | failed              |
|                | cefuroxime axetil                              | 1 week   | failed              |
|                | cefoperazone-sulbactam sodium(monotherapy)     | 2 weeks  | effective           |
|                | cefoperazone-sulbactam sodium+linezoli(P.O)    | 2 weeks  | effective           |
|                | cefoperazone-sulbactam sodium+vancomycin       | 2 weeks  | effective           |
| 2021.9.6       | cefoperazone-sulbactam sodium+linezolid(P.O)   | 2 weeks  | effective           |
|                | cefoperazone-sulbactam sodium+vancomycin       | 2 weeks  | effective           |
| 2021.12.30     | cefoperazone-sulbactam sodium+vancomycin       | 2 weeks  | effective           |
|                | cefoperazone-sulbactam sodium+doxycycline(I.V) | 2 weeks  | effective/transient |
| 2022.1.25~2.22 | cefepime                                       | 3 days   | failed              |
|                | fosfomicin sodium+ertapenem                    | 5 days   | transient           |
|                | amoxicillin(P.O) +amikacin                     | 1 weeks  | transient           |
| 2022.2.23~3.22 | amoxicillin(P.O)+amikacin+rifampin             | 2 weeks  | effective/transient |
|                | cefoperazone-sulbactam                         | 2 weeks  | effective/transient |

|                  |
|------------------|
| TABLE 2 continue |
|------------------|

|                |                                                            |          |                     |
|----------------|------------------------------------------------------------|----------|---------------------|
|                | sodium+doxycycline(I.V)                                    |          |                     |
| 2022.3.22~4.21 | cefoperazone-sulbactam<br>sodium+doxycycline(P.O)+rifampin | 10 days  | effective/transient |
|                | amikacin+doxycycline(P.O)+rifampin                         | 10 days  | effective/transient |
|                | cefoperazone-sulbactam                                     | 10 days  | effective/transient |
|                | sodium+doxycycline(I.V)                                    |          |                     |
| 2022.4.22~5.22 | metronidazole+amoxicillin<br>+clindamycin                  | 4 weeks  | failed              |
| 2022.5.23~5.26 | cefoperazone-sulbactam sodium                              | 4 days   | failed              |
| 2022.5.27~8.5  | fosfomycin<br>sodium+imipenem-cilastatin sodium            | 10 weeks | successful          |
| 2022.8.6~10.15 | doxycycline+rifampin                                       | 10 weeks | successful          |
